# Supplementary material for: Insight into mechanism for remarkable photocatalytic hydrogen evolution of Cu/Pr dual atom co-modified TiO2
Source: Royal Society of Chemistry journal article supplement (doi:10.1039/d4nh00196f), 2024-01-01
Supplement: d4nh00196f1.pdf [file d4nh00196f1.pdf]

## Supplementary Material

# Insight into Mechanism for remarkable photocatalytic hydrogen evolution of Cu/Pr dual atom co-modified TiO<sub>2</sub>

Hongshun Zheng <sup>a, b</sup>, Baoye Zi <sup>a</sup>, Tong Zhou <sup>a</sup>, Guoyang Qiu <sup>a</sup>, Zhongge Luo <sup>a</sup>, Qingjie Lu <sup>a</sup>, Alain Rafael Puente Santiago <sup>c, d</sup>, Yumin Zhang <sup>a</sup>, Jianhong Zhao <sup>a</sup>, Jin Zhang <sup>a</sup>, Tianwei He <sup>a, \*</sup>, Qingju Liu <sup>a, b, \*</sup>

<sup>a</sup> *National Center for International Research on Photoelectric and Energy Materials, Yunnan Key Laboratory for Micro/nano Materials & Technology, School of Materials Science and Engineering, Yunnan University, Kunming 650091, China*

<sup>b</sup> *Southwest United Graduate School, Kunming 650091, China*

<sup>c</sup> *Walker Department of Mechanical Engineering, University of Texas at Austin, Austin, TX 78712, USA.*

<sup>d</sup> *Florida International University (FIU), Department of Chemistry and Biochemistry, Miami, FL, USA.*

**\* Corresponding Author: \*Qingju Liu, \*Tianwei He**

**E-mail:** qjliu@ynu.edu.cn (**Q.J. Liu**), he.tianwei@ynu.edu.cn (**T.W.He**).

## Experimental Section

**Materials and Reagents:** The tetrabutyl titanate ( $\text{Ti}(\text{OC}_4\text{H}_9)_4$ ), nitric acid ( $\text{HNO}_3$ ), Praseodymium nitrate hexahydrate ( $\text{Pr}(\text{NO}_3)_3 \cdot 6\text{H}_2\text{O}$ ), Copper(II) chloride ( $\text{CuCl}_2$ ), acetylacetonate, acetone, and absolute ethanol were purchased from Sinopharm Chemical Reagent Co., Ltd. (Shanghai, China). All reagents were of analytical grade and used without further purification. Deionized (DI) water and hydrolytic inhibitor (a mixture of acetylacetonate, acetone, and absolute ethanol) were prepared by our group.

**Characterizations:** Powder X-ray diffraction (XRD) was carried out on an X-ray diffractometer (RIGAKUTTRIII-18KW) with a  $\text{Cu K}\alpha$  source. The morphology was observed by transmission electron microscope (TEM) (JEM-2100). The aberration-corrected high-angle annular dark-field (ac-HAADF) STEM for the  $\text{Cu/Pr-TiO}_2$  was obtained using JEM-ARM300F equipment. The photoluminescence (PL) spectra and time-resolved fluorescence decay spectroscopy were obtained by an FLS 1000 fluorescence spectrophotometer (UK), where the sample powder was placed on a copper support. When testing the steady-state PL, 351 nm was selected for excitation. For PL decay testing, 400 nm and 500 nm were respectively selected for excitation and detection.

**Photocatalytic Experiments:** The hydrogen production performance is tested by the high air tightness automatic online photocatalytic analysis system (PCX-50C, Beijing Perfectlight Technology Co., Ltd.). The catalyst (10 mg) and 20 ml of water with 30% methanol (10 mL) were mixed in a reaction cell, irradiated with the 365 nm LED wavelengths after removing the air. Meanwhile, the cooling water was used to maintain the temperature at 298.15 K. The generated  $\text{H}_2$  was analyzed via a gas chromatograph (GC9790II).

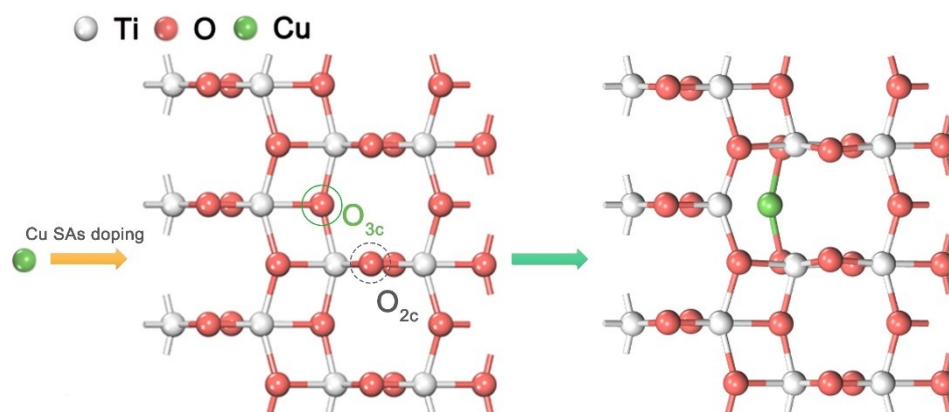

**Fig. S1** The most stable slab model of  $\text{Cu/TiO}_2$ .

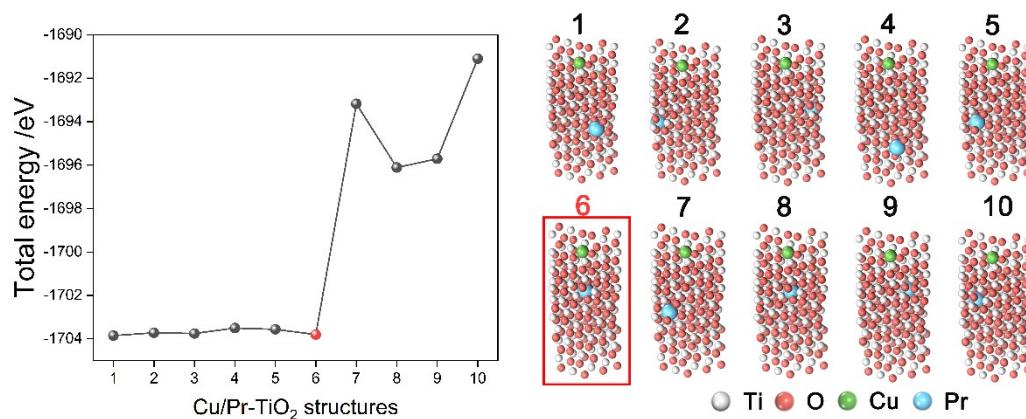

**Fig. S2** The most stable slab structure model of Cu/Pr-TiO<sub>2</sub>.

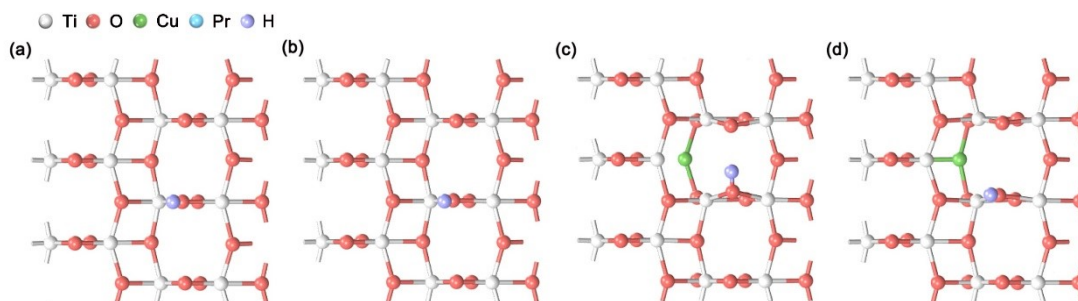

**Fig. S3** Top view of the most stable H\* adsorption structures of O site for (a) TiO<sub>2</sub>, (b) Pr-TiO<sub>2</sub>, (c) Cu/TiO<sub>2</sub> and (d) Cu/Pr-TiO<sub>2</sub>.

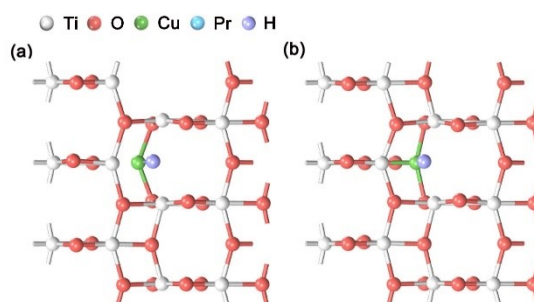

**Fig. S4** Top of the most stable H\* adsorption structures of Cu site for (a) Cu/TiO<sub>2</sub> and (b) Cu/Pr-TiO<sub>2</sub>.

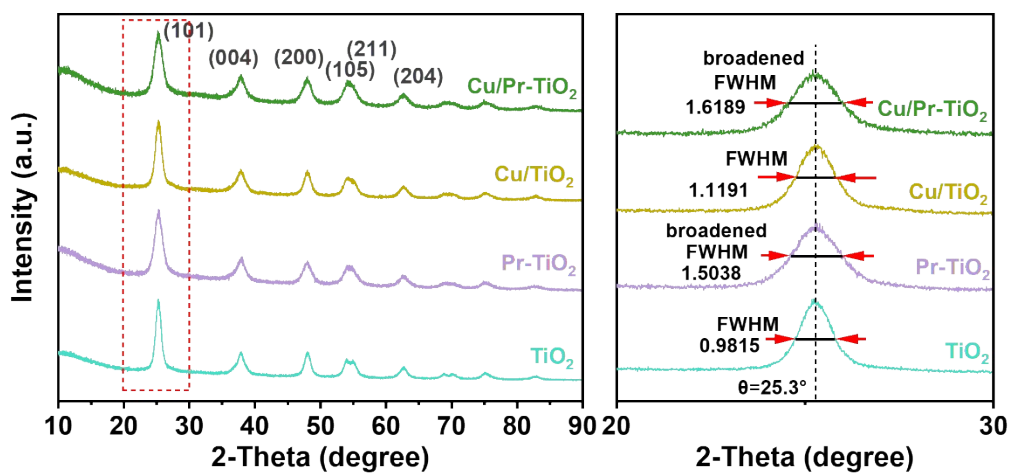

Fig. S5 XRD pattern of TiO<sub>2</sub>, Pr-TiO<sub>2</sub>, Cu/TiO<sub>2</sub> and Cu/Pr-TiO<sub>2</sub>.

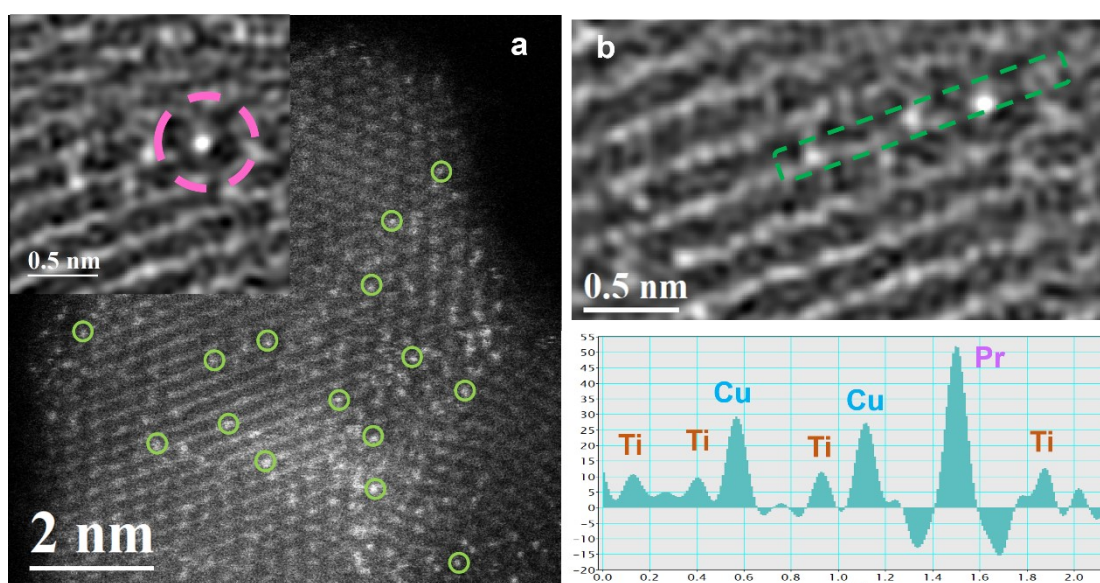

Fig. S6 a) HAADF-STEM image of Cu/Pr-TiO<sub>2</sub> (Cu single atoms marked by green circles). b) A zoomed-in HAADF-STEM image of Cu/Pr-TiO<sub>2</sub> with atomically dispersed Cu site and Pr site and corresponding intensity profiles.

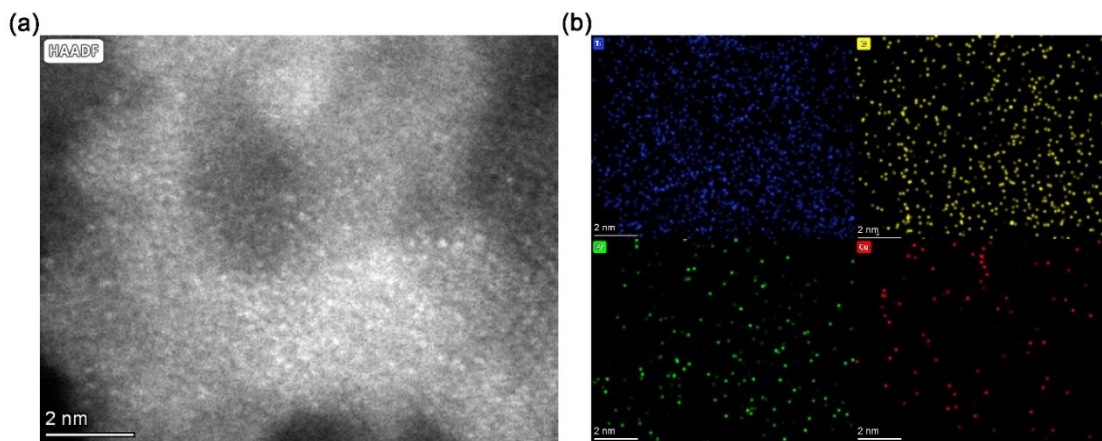

**Fig. S7** EDS element mapping images of Cu/Pr-TiO<sub>2</sub>.
